# Supplementary material for: Biodegradable copolyester poly(butylene-co-isosorbide succinate) as hot-melt adhesives
Source: Royal Society of Chemistry journal article supplement (doi:10.1039/c9ra01780a), 2019-01-01
Supplement: c9ra01780a1.pdf [file c9ra01780a1.pdf]

## Support Information

All the quantum chemical calculations were performed with the Gaussian 09 program package using B3LYP hybrid density functional theory and 6-31G basis. Figure 1 has shown the structure of isosorbide-succinate-isosorbide-succinate-isosorbide (ISISI), isosorbide-succinate-butylene-succinate-isosorbide (ISBSI), and butylene-succinate-butylene-succinate-butylene (BSBSB).

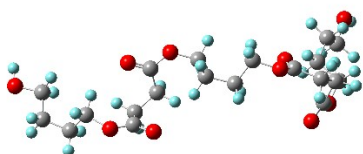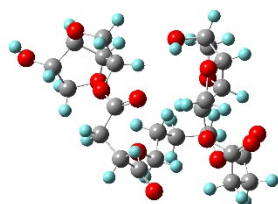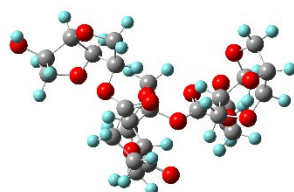

Figure1. Structure by Gaussian 09.  
a. BSBSB; b. ISBSI; c. ISISI
